# Supplementary material for: Temperature-induced reversible structural phase transition of 1-(chloromethyl)-1,4-diazoniabicyclo[2.2.2]octane bis(perchlorate)
Source: Royal Society of Chemistry journal article supplement (doi:10.1039/c3ce42190b), 2014-01-01
Supplement: c3ce42190b1.pdf [file c3ce42190b1.pdf]

## Supporting Information for

Temperature-induced reversible structural phase transition of 1-(Chloromethyl)-1,4- diazoniabicyclo[2.2.2] octane bis(perchlorate)

Li-Zhuang Chen,<sup>\*,a</sup> Deng-Deng Huang,<sup>a</sup> Jia-Zhen Ge,<sup>b</sup> and Fang-Ming Wang<sup>a</sup>

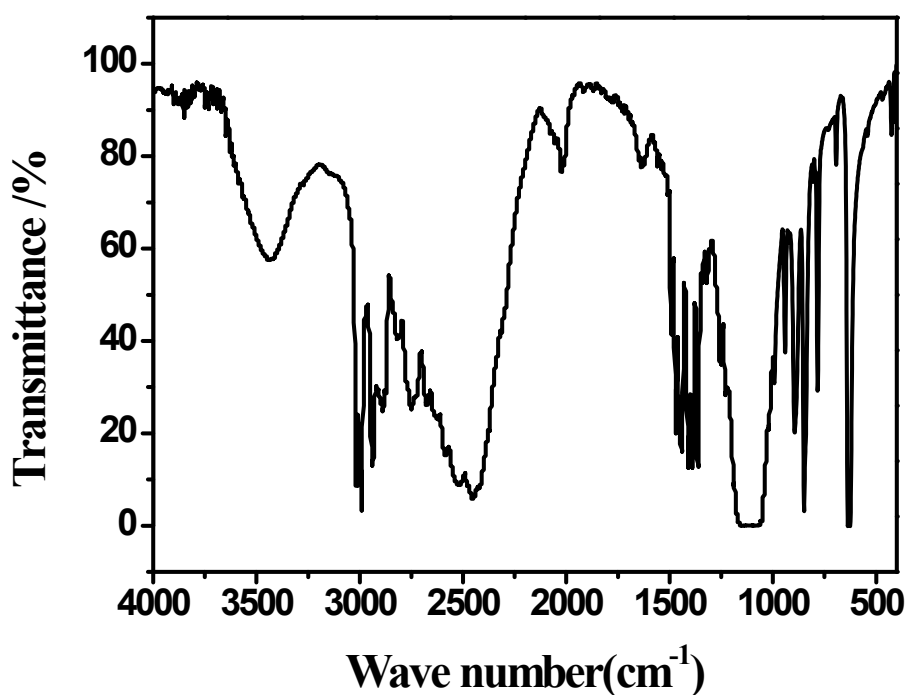

Figure S1 IR of compound 1

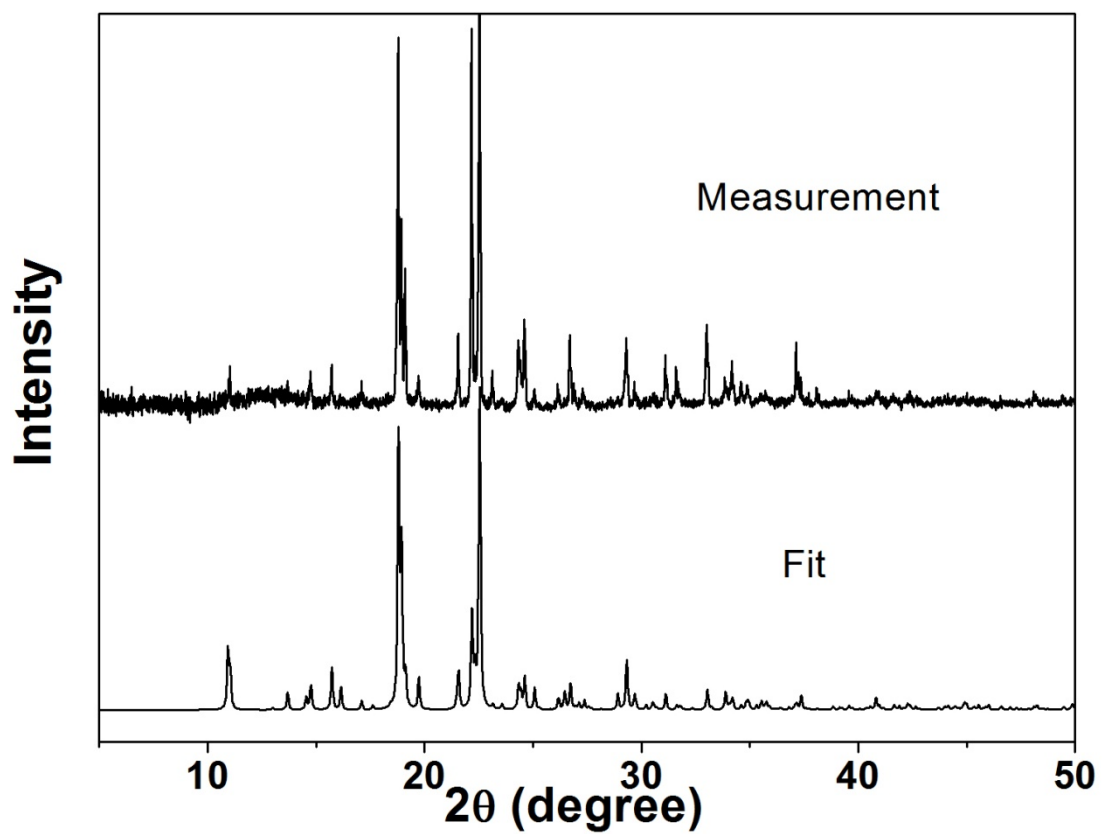

Figure S2 XRPD pattern of compound 1, where the lower line is the simulated pattern.

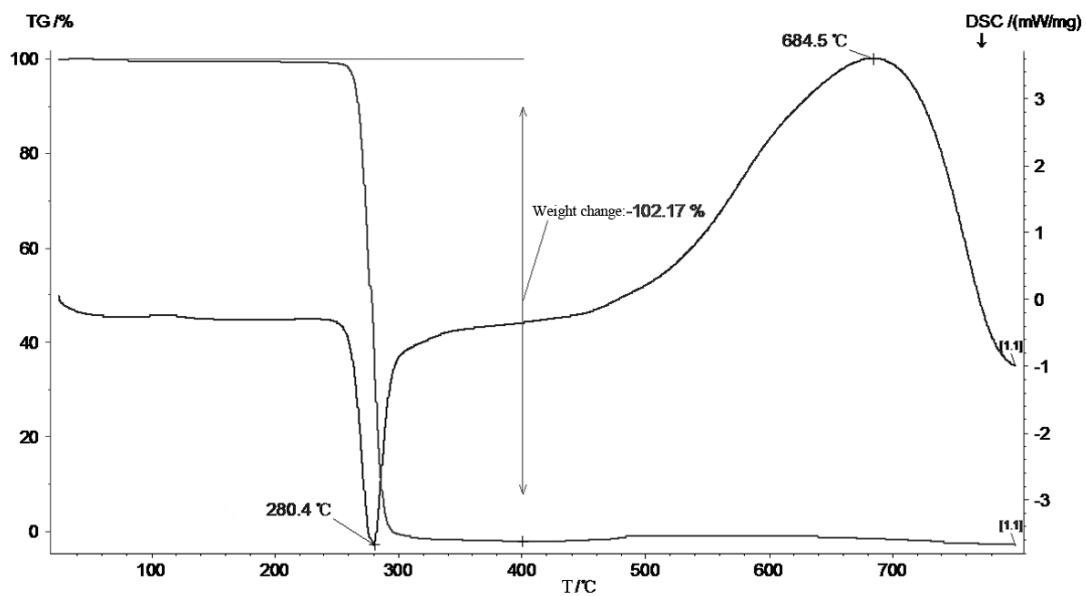

Figure S3 TG and DSC curve of compound 1

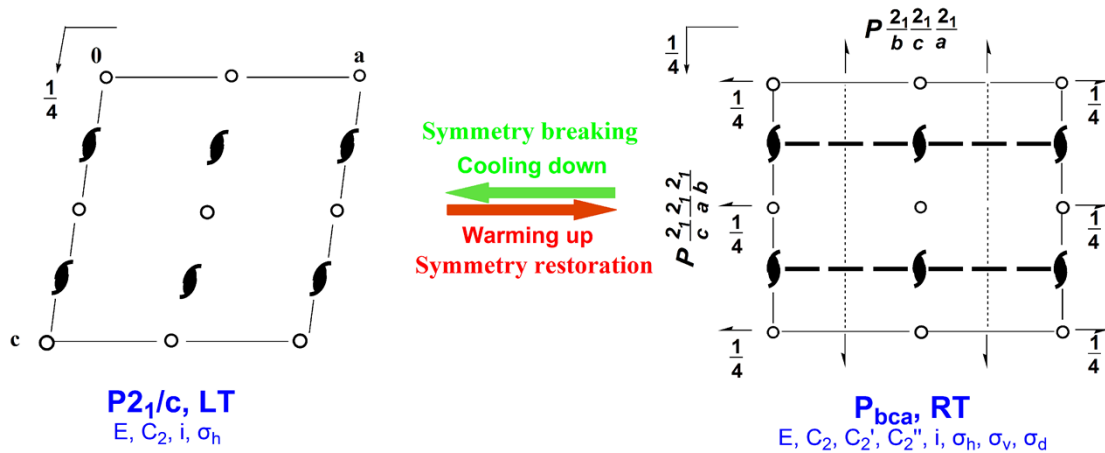

**Figure S4** Changes of symmetry operations of 1 from  $Pbc2_1$  at HTP to  $P2_1/c$  at LTP.

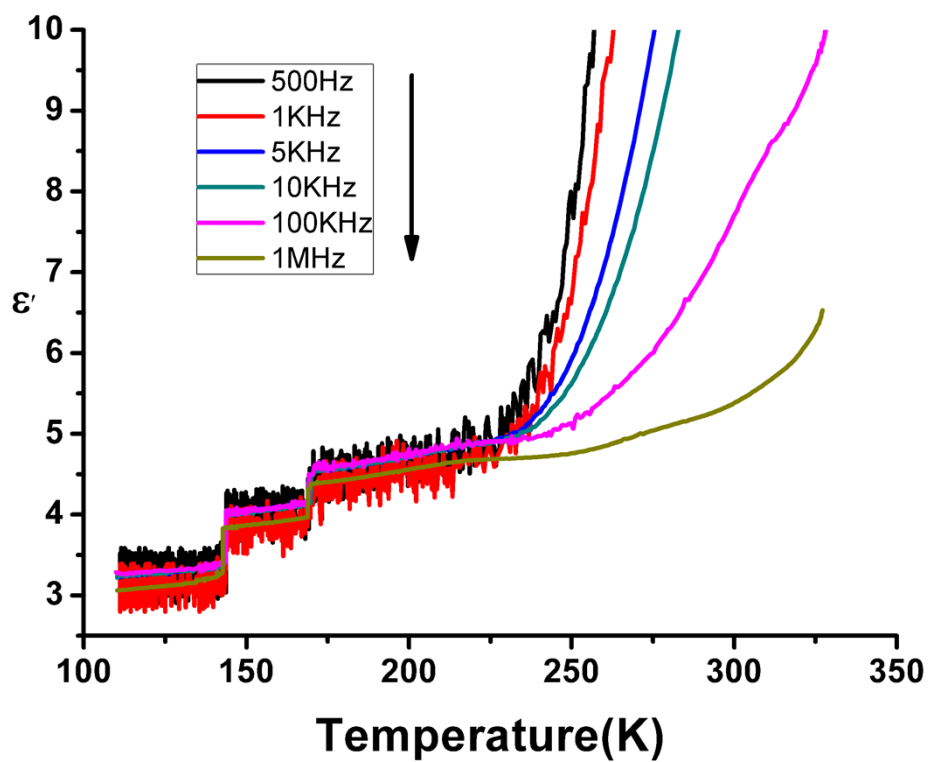

**Figure S5** Dependence of the dielectric constants of complex 1 on temperature from 100K to 320K at different frequency ranges.

**Table S1.** Hydrogen Bond Lengths (Å) and Bond Angles (°) (291K)

| D–H...A                 | d(D–H) | d(H...A) | d(D...A) | ∠DHA |
|-------------------------|--------|----------|----------|------|
| N(2)–H(2A) ...O(2) #1   | 0.91   | 2.42     | 3.099(9) | 132  |
| N(2)–H(2A) ...O(5) #1   | 0.91   | 2.37     | 3.083(6) | 135  |
| 1 N(2)–H(2A) ...O(8) #1 | 0.91   | 2.21     | 2.917(5) | 134  |

Symmetry codes: #1: 1/2-x, 1/2+y, z

**Table S2.** Hydrogen Bond Lengths (Å) and Bond Angles (°) (170K)

| D–H...A             | d(D–H) | d(H...A) | d(D...A) | ∠DHA |
|---------------------|--------|----------|----------|------|
| N(1)–H(1C) ...O(1)  | 0.93   | 2.36     | 3.045(8) | 131  |
| N(1)–H(1C) ...O(1') | 0.93   | 2.36     | 3.027(9) | 129  |
| N(1)–H(1C) ...O(6)  | 0.93   | 2.30     | 3.035(4) | 135  |
| N(1)–H(1C) ...O(7)  | 0.93   | 2.17     | 2.883(4) | 132  |

**Table S3.** Hydrogen Bond Lengths (Å) and Bond Angles (°) (100K)

| D–H...A                | d(D–H) | d(H...A) | d(D...A) | ∠DHA |
|------------------------|--------|----------|----------|------|
| N(1)–H(1C) ...O(4) #1  | 0.93   | 2.34     | 3.016(7) | 129  |
| N(1)–H(1C) ...O(6) #2  | 0.93   | 2.28     | 3.030(7) | 138  |
| N(1)–H(1C) ...O(7) #2  | 0.93   | 2.18     | 2.872(7) | 130  |
| N(3)–H(3C) ...O(15)    | 0.93   | 2.33     | 3.019(7) | 131  |
| N(3)–H(3C) ...O(10) #2 | 0.93   | 2.15     | 2.867(7) | 133  |
| N(3)–H(3C) ...O(11) #2 | 0.93   | 2.33     | 3.033(7) | 132  |

Symmetry codes: #1: -1+x, y, z; #2: -1+x, 1/2-y, 1/2+z
